# Supplementary material for: Development and validation of LRP1B mutation-associated prognostic model for hepatocellular carcinoma
Source: Oxford University Press journal article supplement (doi:10.1042/bsr20211053), 2021-08-13
Supplement: bsr-2021-1053_supp.pdf [file bsr-2021-1053_supp.pdf]

Supplementary Figure S1.

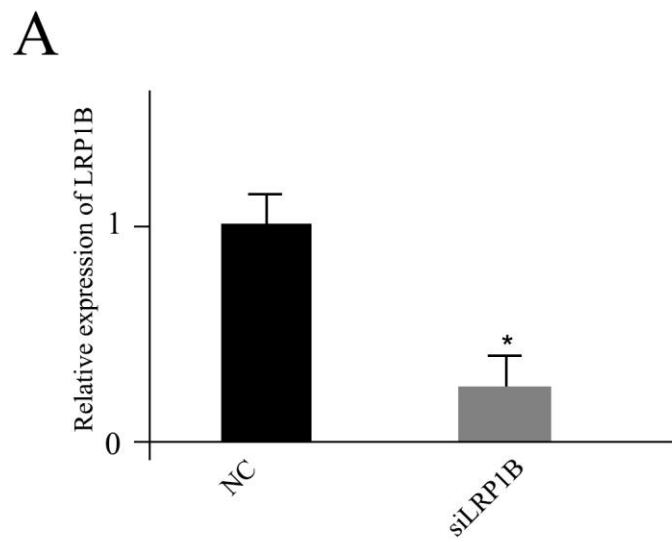

**Supplementary Figure 1.** The RT-PCR measurement for siLRP1B efficiency. NC: negative control. \* indicates  $P < 0.05$  compared with NC.

Supplementary Table 1 clinicopathological characteristics of 120 HCC participants

| Characteristics                                  | Groups        | Patient |      |
|--------------------------------------------------|---------------|---------|------|
|                                                  |               | NO.     | %    |
| Sex                                              | Male          | 76      | 63.3 |
|                                                  | Female        | 44      | 36.7 |
| Age at diagnosis                                 | < 61(Median)  | 68      | 56.7 |
|                                                  | >= 61(Median) | 52      | 43.3 |
| Pathological TNM stage                           | I             | 51      | 42.5 |
|                                                  | II            | 36      | 30.0 |
|                                                  | III           | 21      | 17.5 |
|                                                  | IV            | 12      | 10.0 |
|                                                  | None          | 33      | 27.5 |
| Adjacent hepatic tissue inflammation extent type | Mild          | 42      | 35.0 |
|                                                  | Severe        | 32      | 26.7 |
|                                                  | Unknown       | 13      | 10.8 |
| Person neoplasm cancer status                    | Tumor Free    | 76      | 43.4 |
|                                                  | With Tumor    | 24      | 20.0 |
|                                                  | Unknown       | 20      | 16.7 |
| Vascular tumor cell type                         | None          | 52      | 43.3 |
|                                                  | Micro         | 34      | 28.3 |
|                                                  | Macro         | 18      | 15.0 |
|                                                  | Unknown       | 16      | 13.3 |
